# Supplementary material
Source: publisher figshare collection journal article supplement (https://acs.figshare.com/ndownloader/files/31168911)
Supplement: Supplementary file 1 [file 31168911]

## **Supporting information for**

### **Spontaneous cleavage at Glu and Gln residues in long-lived proteins.**

Michael G. Friedrich<sup>1\*</sup>, Zhen Wang<sup>2</sup>, Kevin L. Schey<sup>2</sup> and Roger J. W. Truscott<sup>1</sup>

<sup>1</sup> Illawarra Health and Medical Research Institute, University of Wollongong, Wollongong, NSW, 2522, Australia

<sup>2</sup> Department of Biochemistry and Mass Spectrometry Research Center, Vanderbilt University School of Medicine, Nashville, TN, USA

**Correspondance:** Michael G. Friedrich<sup>1</sup> Illawarra Health and Medical Research Institute, University of Wollongong, Wollongong, NSW, 2522, Australia.

Email [michaelf@uow.edu.au](mailto:michaelf@uow.edu.au)

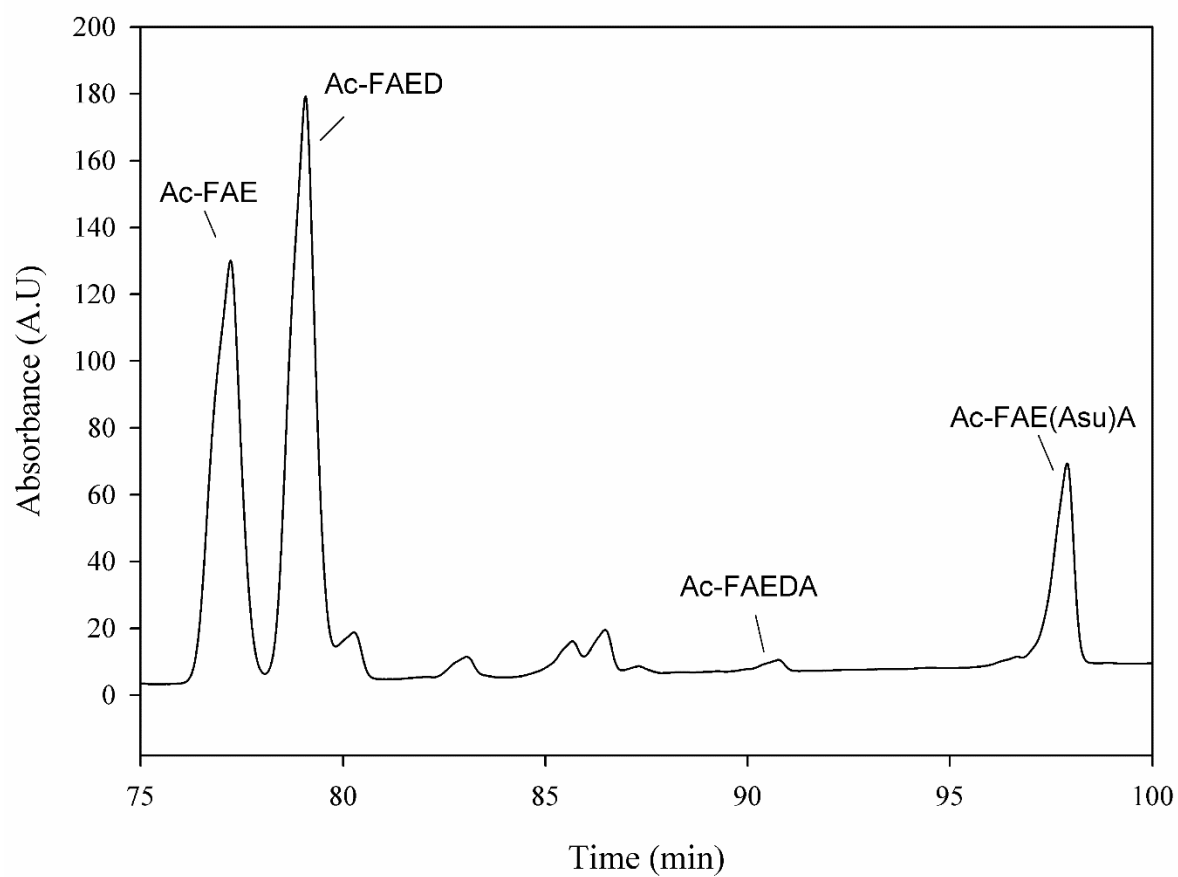

**Supplemental Figure 1. Breakdown of Ac-FAEDA at pH 4. HPLC profile of Ac-FAEDA after incubation for 25 days at 60°C.** The pH 4.0 incubation displayed little original Ac-FAEDA after this time. All peaks labelled were identified by mass spectrometry.

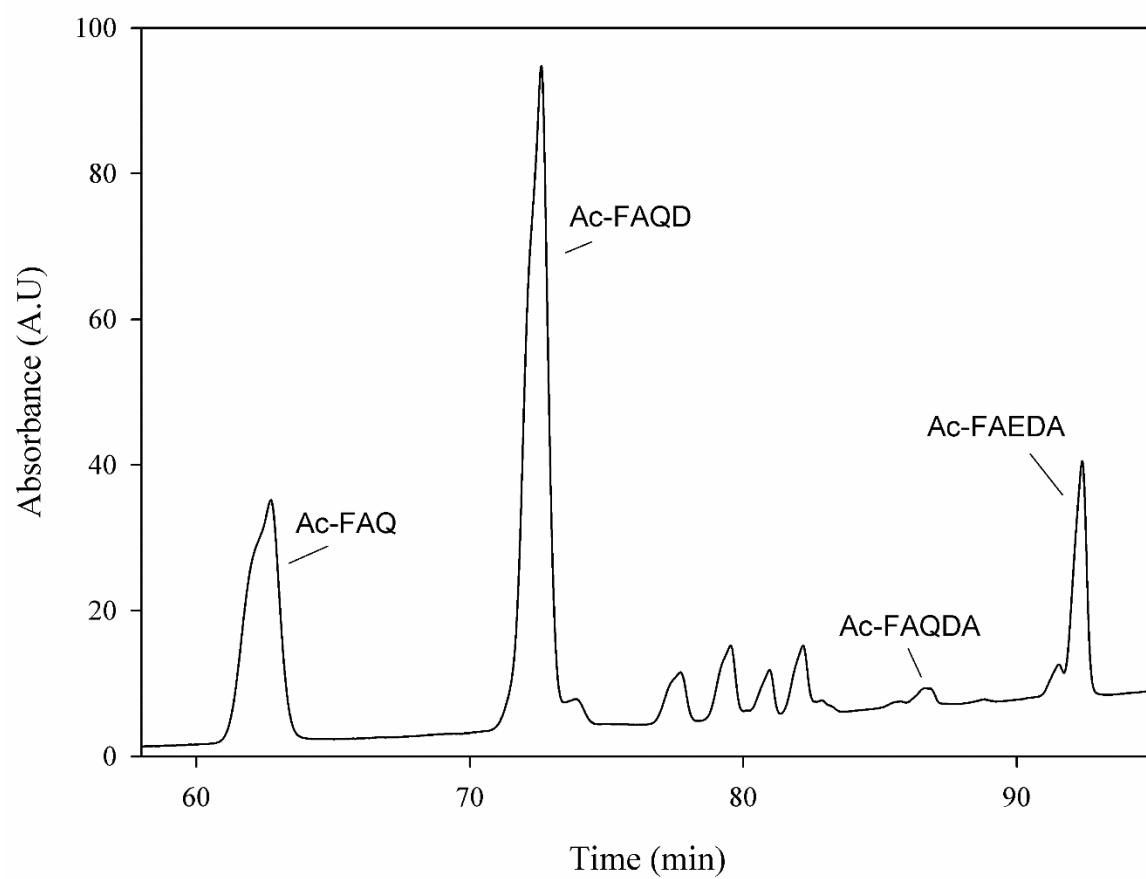

**Supplemental Figure 2. HPLC profiles of Ac-FAQDA after incubation at pH 4 for 25 days at 60°C.** At pH 4.0 little Ac-FAQDA remained. All peaks labelled were identified by mass spectrometry.

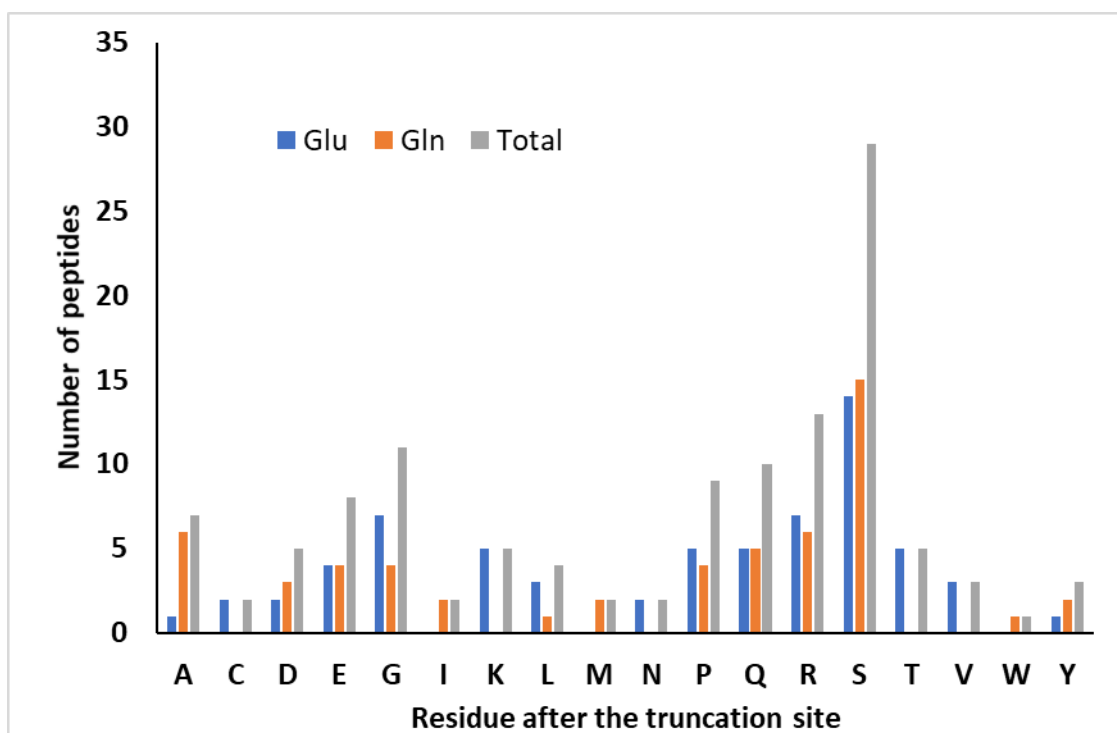

**Supplemental figure 3.** Histogram showing the amino acids occurring on the C-terminal side of Gln and Glu cleavage sites

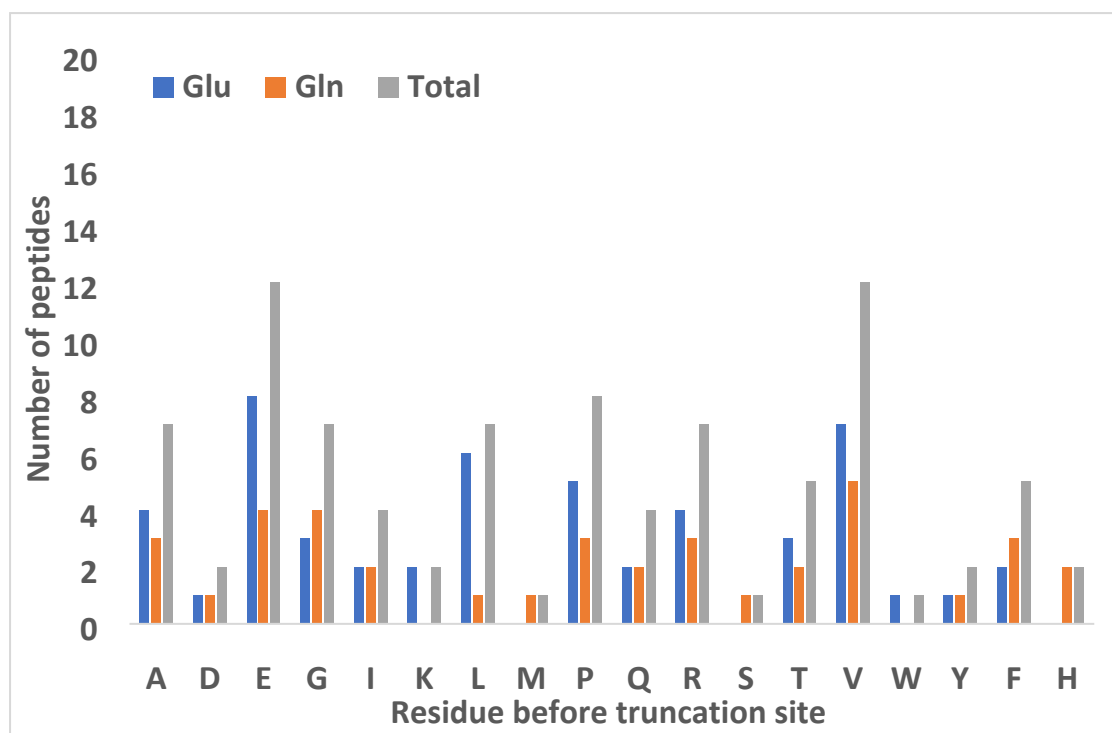

**Supplemental figure 4.** Histogram showing the amino acids occurring on the N-terminal side of Gln and Glu cleavage sites

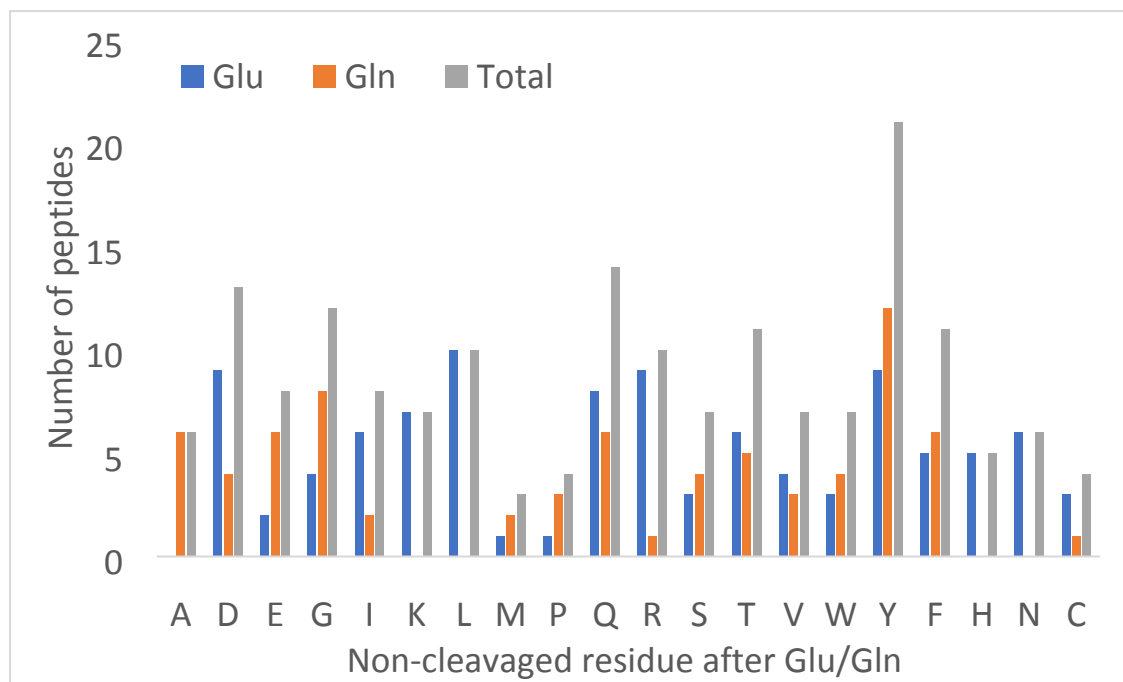

**Supplemental figure 5.** Histogram showing the amino acids occurring on the C-terminal side of Gln and Glu at sites in lens crystallins that did not show evidence of cleavage.
